# Supplementary material for: A Soluble Acetylcholinesterase Provides Chemical Defense against Xenobiotics in the Pinewood Nematode
Source: PubMed Central journal article supplement (PMC3083410; doi:10.1371/journal.pone.0019063), 2011-04-27

**BxACE-1Pab**

1

2

3

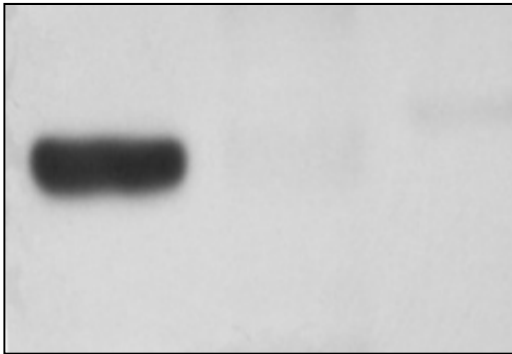

**BxACE-2Pab**

1

2

3

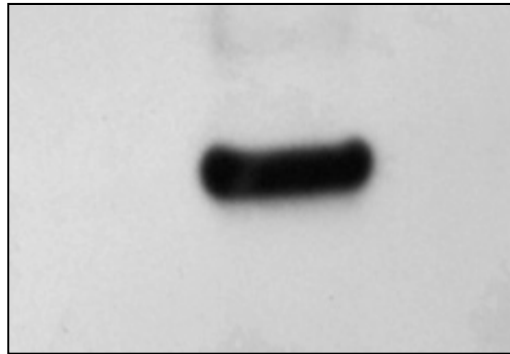

**BxACE-3Pab**

1

2

3

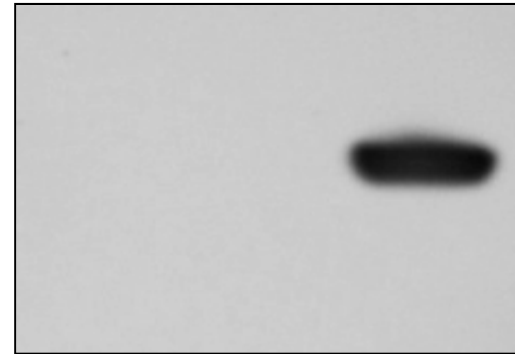

Supplement: pone.0019063.s001.pdf [file pone.0019063.s001.pdf]
