# Supplementary material for: A Soluble Acetylcholinesterase Provides Chemical Defense against Xenobiotics in the Pinewood Nematode
Source: PubMed Central journal article supplement (PMC3083410; doi:10.1371/journal.pone.0019063), 2011-04-27
Supplement: pone.0019063.s002.pdf [file pone.0019063.s002.pdf]

| Genes          | Name                  | Sequences <sup>a</sup>                                  |
|----------------|-----------------------|---------------------------------------------------------|
| <i>Bxace-3</i> | <i>5Bxace-3</i> siRNA | <b>TAATACGACTCACTATAGGGAGAGCTACCAGCAGAGTCTGCCATAAT</b>  |
|                | <i>3Bxace-3</i> siRNA | <b>TAATACGACTCACTATAGGGAGATTTGAGGCAGTCCAATATGTACTG</b>  |
| <i>pQE30</i>   | <i>5pQE30</i> siRNA   | <b>TAATACGACTCACTATAGGGAGACCCCGTTTTTCACCATGGGCAAATA</b> |
|                | <i>3pQE30</i> siRNA   | <b>TAATACGACTCACTATAGGGAGAATTCTGCCGACATGGAAGCCATCA</b>  |

<sup>a</sup> Bold sequences indicate T7 promoter sequence for synthesis of dsRNA.
