# Supplementary material for: A Soluble Acetylcholinesterase Provides Chemical Defense against Xenobiotics in the Pinewood Nematode
Source: PubMed Central journal article supplement (PMC3083410; doi:10.1371/journal.pone.0019063), 2011-04-27
Supplement: pone.0019063.s003.pdf [file pone.0019063.s003.pdf]

| Enzyme mixtures        |                                       | Chlorpyrifos-oxon<br>(10 <sup>-6</sup> M) | Dichlorvos<br>(10 <sup>-5</sup> M) | Carbofuran<br>(10 <sup>-5</sup> M) |
|------------------------|---------------------------------------|-------------------------------------------|------------------------------------|------------------------------------|
| IC <sub>50</sub>       | ACE-1+ACE-2                           | 0.12                                      | 0.28                               | 0.06                               |
|                        | ACE-1+ACE-2+ACE-3                     | 0.17                                      | 0.36                               | 0.08                               |
|                        | ACE-1+ACE-2+pre <sup>a</sup> -BSA     | 0.15                                      | 0.42                               | 0.10                               |
|                        | ACE-1+ACE-2+pre-ACE-3                 | 0.25                                      | 0.65                               | 0.12                               |
| IC <sub>50</sub> ratio | (ACE-1+ACE-2+ACE-3)/(ACE-1+ACE-2)     | 1.4                                       | 1.3                                | 1.3                                |
|                        | (ACE-1+ACE-2+pre-ACE-3)/(ACE-1+ACE-2) | 2.0                                       | 2.3                                | 1.9                                |

<sup>a</sup> Indicates pre-incubation for 10 min before adding to mixture of ACE-1 and ACE-2.
